# Supplementary material for: Use of over-the-counter supplements, sleep aids and analgesic medicines in rheumatology: results of a cross-sectional survey
Source: PubMed Central journal article supplement — Rheumatol Adv Pract. 2024 Oct 9;8(4):rkae129. doi: 10.1093/rap/rkae129 (PMC11543522; doi:10.1093/rap/rkae129), 2024-10-09
Supplement: rkae129_supplementary_data.pdf [file rkae129_supplementary_data.pdf]

## Supplementary Material

### Copy of electronic survey to patients

#### Assembling the data jigsaw: Improving MSK research using patient-generated health data (PGHD)

##### Prevalence Survey

Thank you for being willing to take part in this survey about medication and social care use, led by researchers at The University of Manchester in partnership with the rheumatology team at Salford Royal.

We are keen to understand two things. First, what types of pain relievers and supplements are being taken by people living with arthritis and other musculoskeletal diseases, and second, whether the same group of people get help with day-to-day activities (for example from family and friends or more formal help from care services).

After collecting some brief information about you, the survey will ask about your medication use **in the last week**. Once complete, the survey results will be posted in the waiting area of the rheumatology department in order that you can see what we have learnt.

The survey should take no more than 5 minutes. Your responses will be seen by the research team only and will not be shared with the clinical team.

#### About you

1. Please tell us your year of birth [numerical, range 1900-2005]
2. Please tell us your gender
3. Please tell us the first half of postcode [one or two letters, then one or two numbers]
4. Please tell us your ethnicity
5. Please indicate your rheumatic and musculoskeletal conditions  
*Select all that apply*
  - Rheumatoid arthritis [Box]
  - Psoriatic arthritis [Box]
  - Axial spondyloarthritis/ ankylosing spondyloarthritis [Box] etc
  - Other inflammatory arthritis
  - Osteoarthritis
  - Gout
  - Fibromyalgia/ chronic widespread pain
  - Systemic sclerosis
  - Myositis
  - Lupus
  - Sjogren's syndrome
  - Vasculitis
  - Osteoporosis
  - Other [Free text] \_\_\_\_\_
6. Please indicate any other health conditions  
Include here as tick box  
Heart disease, cancer (previous), cancer (current) recurrent infections, gastrointestinal disease, osteoporosis, depression, anxiety

Other [Free text – ideally allow one line per other additional health condition]\_\_\_\_\_

### Part 1: Your medications

We are interested in learning about what medication and supplements you took **in the last week**.

7) Have you taken any pain relievers\* such as paracetamol, non-steroidal anti-inflammatory or opioid drugs, **in the last week**? We are interested in prescription medicines, drugs you have purchased over the counter or non-prescription drugs. **Non-prescription drugs maybe those that are bought from the internet or borrowed from a family member.**

\*For a list of pain relieving and opioid medications, please see below.

Yes/No

*If yes:*

Please choose all those that apply and add any others that are not listed, marking whether the medication is provided by prescription or not.

#### 7a) Non-opioid pain relievers (for example, paracetamol, ibuprofen)

|                                              | Prescription | over the counter | non-prescription |
|----------------------------------------------|--------------|------------------|------------------|
| Paracetamol                                  | [Box]        | [Box]            | [Box]            |
| <i>Non-steroidal anti-inflammatory drugs</i> |              |                  |                  |
| Ibuprofen                                    | [Box]        | [Box]            | [Box]            |
| Naproxen                                     |              |                  |                  |
| Diclofenac                                   |              |                  |                  |
| Celecoxib                                    |              |                  |                  |
| Mefenamic acid                               |              |                  |                  |
| Etoricoxib                                   |              |                  |                  |
| Indomethacin                                 |              |                  |                  |
| Other _____ (please specify)                 |              |                  |                  |

#### 7b) Opioid pain-relievers

For the opioid drugs, in addition to marking whether the medication is provided by prescription or not, please enter some additional details on how much you have taken on average **in the last week** for each medication you take. For example, taking codeine 30mg tablets 4 times a day, you might enter Dose= 30, Units= mg, frequency= 4/ day.

| Prescription                                  | Over the counter       | Non-prescription                  |
|-----------------------------------------------|------------------------|-----------------------------------|
| <i>Dose/tablet strength (numerical value)</i> | <i>Units (mg/ mcg)</i> | <i>Frequency (x per day/week)</i> |

#### Tablets

Codeine  
Dihydrocodeine  
Cocodamol  
Codydramol  
Tramadol

Morphine  
Oromorph  
Oxycodone  
Patches  
Buprenorphine  
Fentanyl  
Other \_\_\_\_\_(please specify)

**8)** Have you taken any sleep aids or cannabidiol (CBD) oils or similar **in the last week**, either purchased over the counter or via the internet? Yes/No

*If yes:*

Please choose all those that apply and add any others that are not listed

| <b>8a)</b> Sleep aids:                                                            | Prescription | Over the counter | Non-prescription/ |
|-----------------------------------------------------------------------------------|--------------|------------------|-------------------|
| Antihistamines for sleep (Benadryl, Nytol)                                        |              | [Box]            | [Box]             |
| Melatonin                                                                         |              |                  |                   |
| Zopiclone                                                                         |              |                  |                   |
| Zolpidem                                                                          |              |                  |                   |
| Benzodiazepine (e.g. diazepam [Valium], alprazolam [Xanax], lorazepam, temazepam) |              |                  |                   |
| Other _____(list what)                                                            |              |                  |                   |

|                                             |                           |                           |
|---------------------------------------------|---------------------------|---------------------------|
| <b>8b)</b> Cannabidiol (CBD) oil or similar | Over the counter<br>[Box] | Non-prescription<br>[Box] |
|---------------------------------------------|---------------------------|---------------------------|

*If CBDs ticked:*

**8c)** What CBD product do you use? \_\_\_\_\_

**8d)** What do you use it for? Please tick all that apply:

Sleep, anxiety, pain, acne [One box per option, allow multiple responses]

Other (please describe) \_\_\_\_\_

### Supplements

**9)** Do you take any over the counter supplements, including vitamins and minerals, herbal supplements and nutritional supplements? Yes/No

9a) If yes, please tick all those that apply and add any others that are not listed

| Vitamins & Minerals | Herbal/ food Supplements | Specialty Supplements | Sports nutrition & weight management |
|---------------------|--------------------------|-----------------------|--------------------------------------|
| Vitamin D           | Echinacea                | CBD oil               | Protein supplement                   |
| Calcium             | Turmeric                 | Omega-3               | Green tea extract                    |
| Vitamin C           | St John's wort           | Omega-6               | Fat binder tablets                   |
| Zinc                | Valerian                 | Probiotics            | Keto supplements                     |
| Vitamin B/ Bcomplex | Ginseng                  | Glucosamine           | Creatine                             |
| Multivitamin        | Ginkgo biloba            | Chondroitin           | Other_____                           |
| Magnesium           | Cranberry                | Coenzyme- Q10         |                                      |
|                     | Chamomile                |                       |                                      |
|                     | Feverfew                 |                       |                                      |
|                     | Garlic                   |                       |                                      |
|                     | Ginger                   |                       |                                      |
|                     | Goldseal                 |                       |                                      |
|                     | Kava                     |                       |                                      |
|                     | Senna                    |                       |                                      |

**Cost**

10) On average, how much do you spend **per month** on

10a) Prescription medication : £(Numerical value)

10b) Over the counter medications, sleep aids, CBD products and supplements: £(Numerical value)

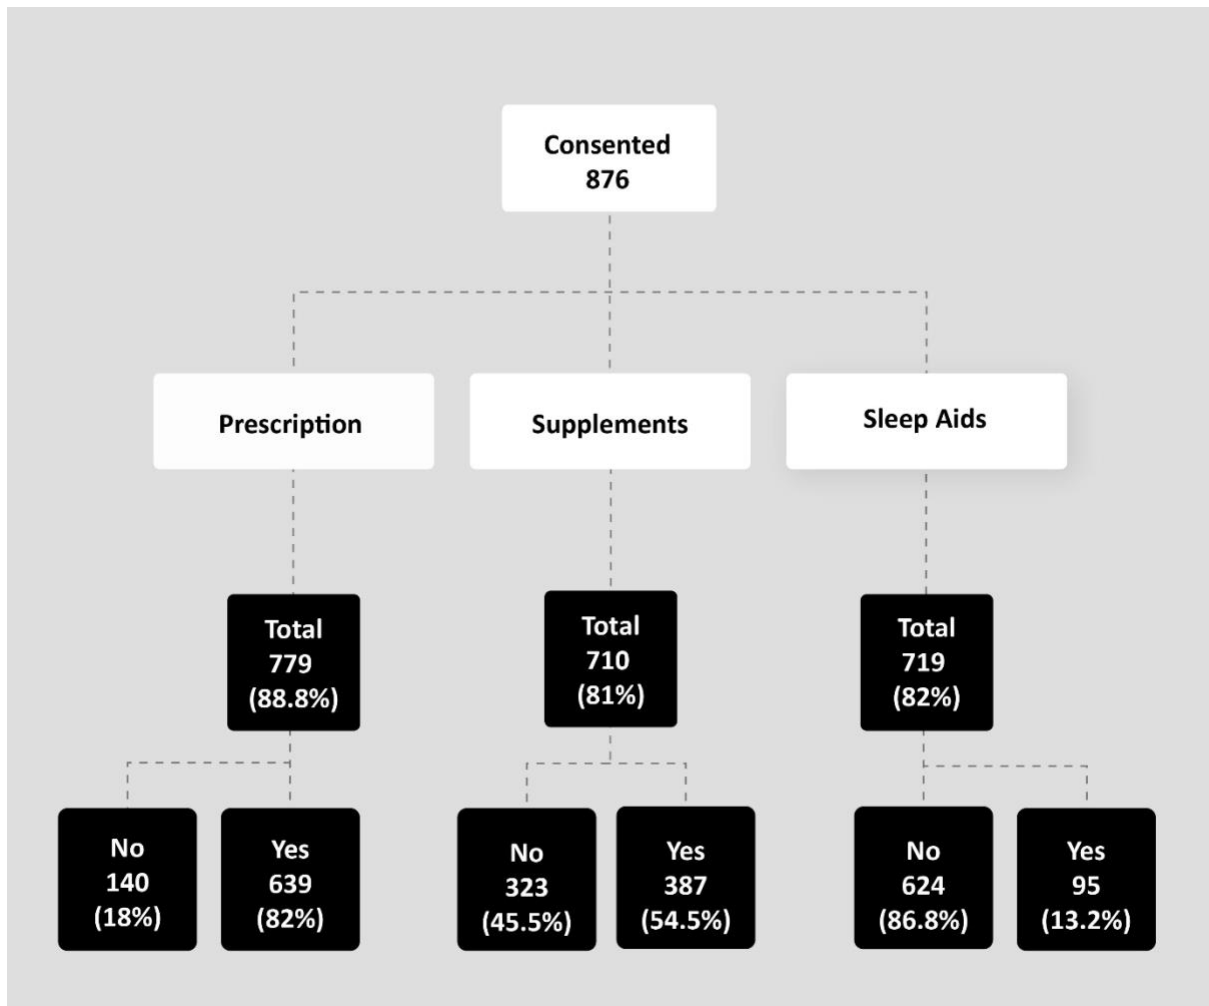

Supplementary Figure S1: Cohort diagram of the final number of patients included in the survey

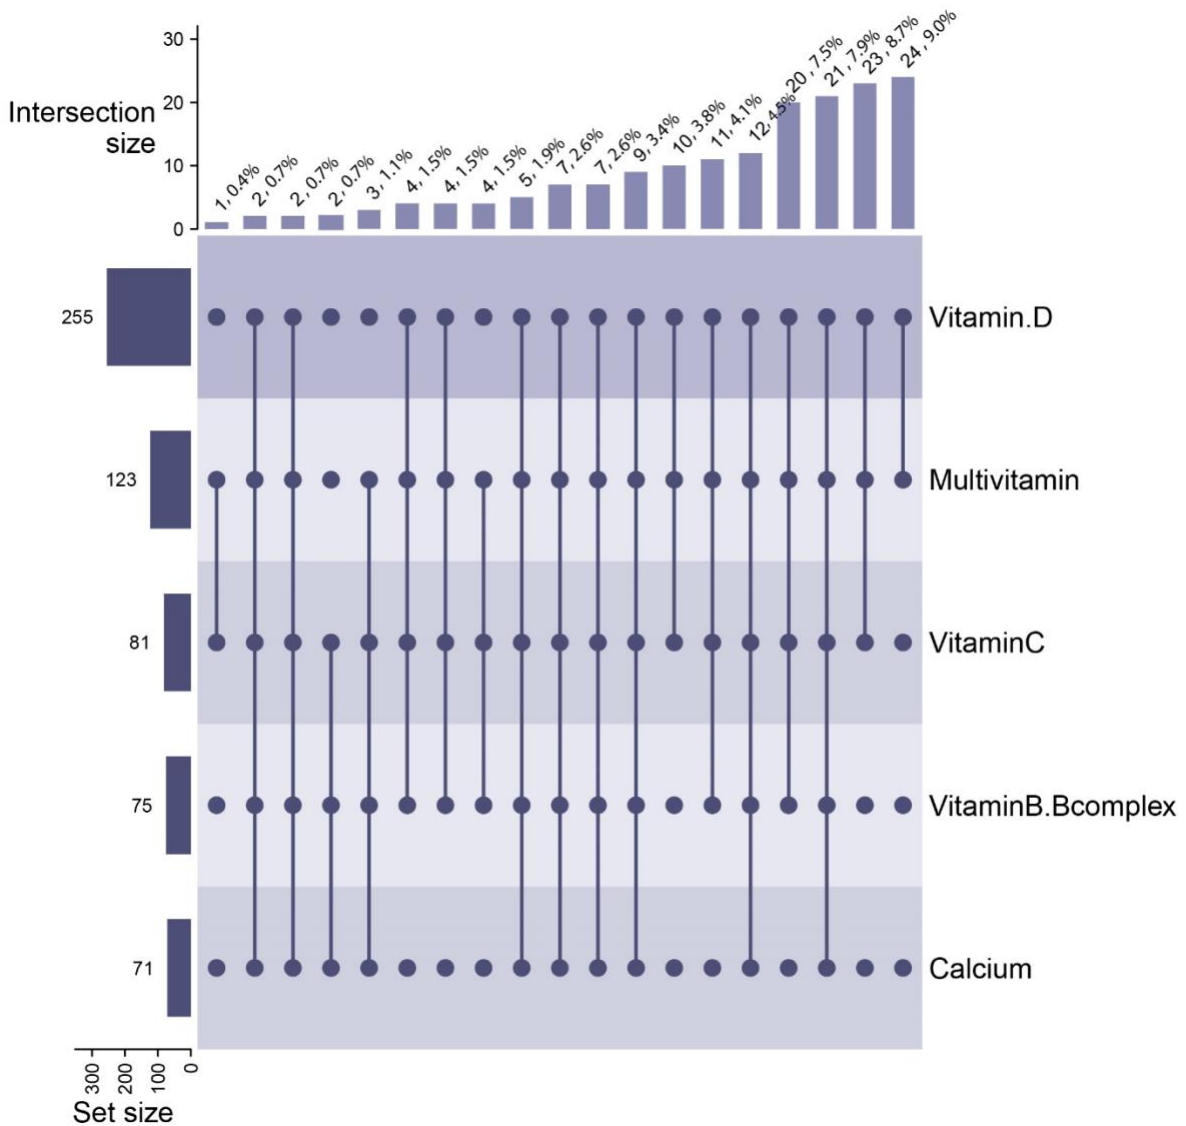

**Supplementary Figure S2: Upset plot showing the distinct overlap between the five most common supplements.** The upset plot shows a bar chart with the number of people in the data who reported some combination or overlap of supplement use. Each bar is a different, mutually exclusive combination. Underneath it is a graphical table showing what those combinations are. Each row is one of our top five most reported supplements: Vitamin D, Multivitamin, Vitamin C, Vitamin B, and Calcium. The black dots and lines show the combination of supplements that comprise each cluster or subset of supplements overlap. Reading from right to left, we can see that the most common subset of supplement overlap is the combination of vitamin D and multivitamins. This shows the unconditional frequency count of each supplement across all subsets. Please note this plot represents a two-way overlap only: for instance, 4 patients (1.5%) overlap between just multivitamins and Vitamin B; however, the overall proportion of this overlap alongside other supplements was  $n=19$  (4.9%).

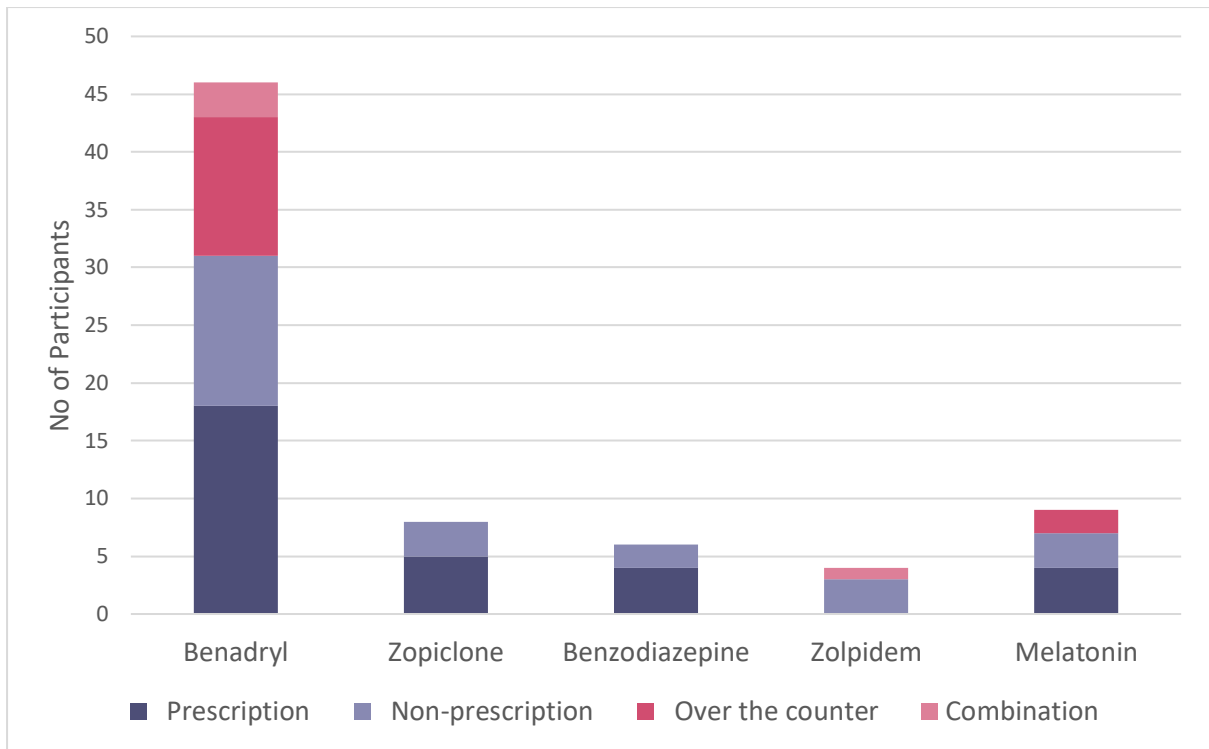

**Supplementary Figure S3: Types of sleep aids used reported by rheumatology patients**

Non-prescription use was defined in the survey as those medicines borrowed from a family member or purchased over the internet.

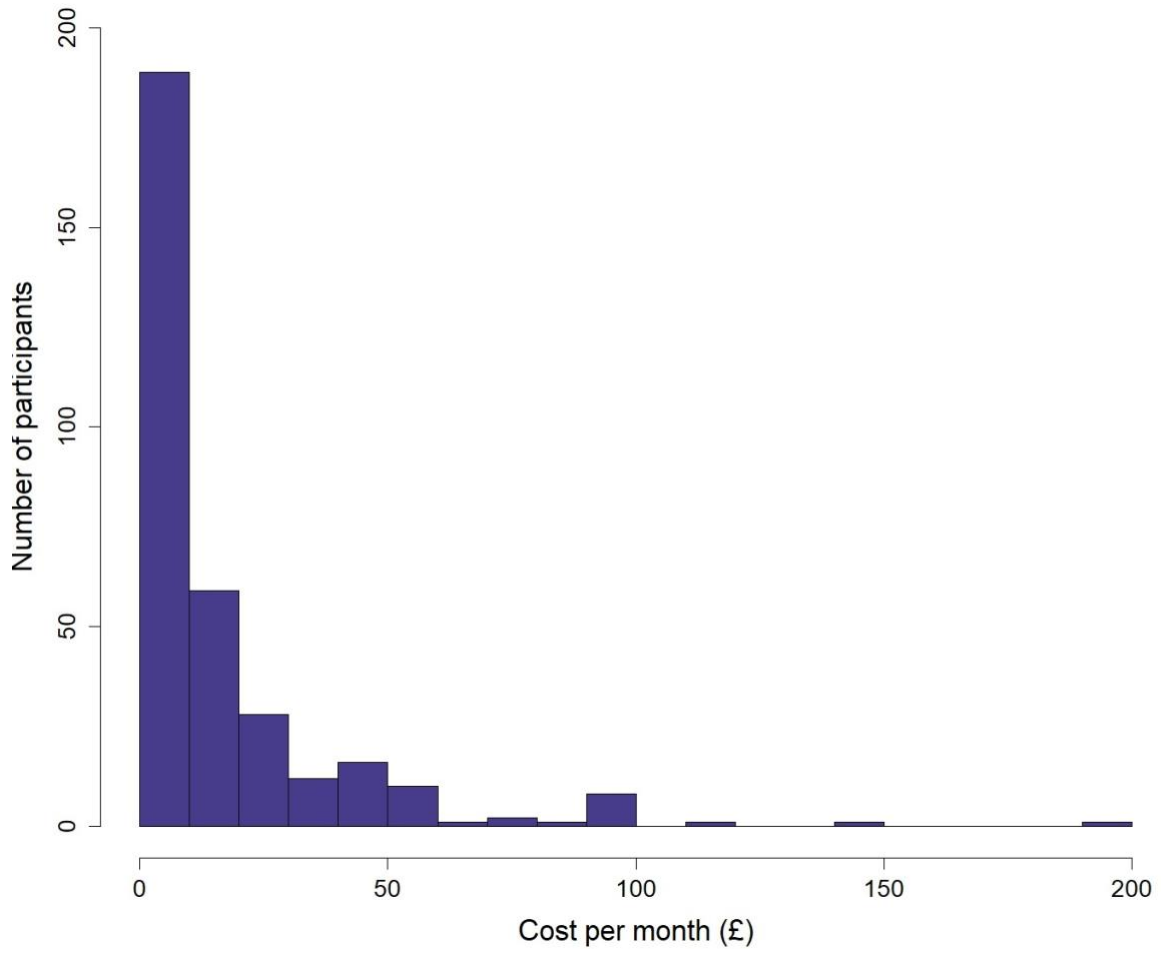

**Supplementary Figure S4: Distribution of Cost: histogram of how much participants spend per month on over-the-counter medications, sleep aids, CBD products, and supplements.**



**Supplementary Table S1: Baseline characteristics of patients**

|                                                | Sleep aids  |             |             | Pain relievers |             |             |
|------------------------------------------------|-------------|-------------|-------------|----------------|-------------|-------------|
|                                                | All (719)   | Yes (95)    | No (624)    | All (779)      | Yes (639)   | No (140)    |
| Age, mean [SD]                                 | 58.3 (14.4) | 52.4 (15.5) | 59.2 (14.0) | 58.4 (14.5)    | 58.5 (14.2) | 57.5 (15.7) |
| 18-39                                          | 93 (12.9%)  | 26 (27.4%)  | 67 (10.7%)  | 100 (12.9%)    | 76 (11.9%)  | 25 (17.9%)  |
| 40-54                                          | 175 (24.3%) | 20 (21.1%)  | 155 (24.8%) | 188 (24.1%)    | 160 (25.0%) | 28 (20.0%)  |
| 55-69                                          | 278 (38.6%) | 36 (37.9%)  | 242 (38.7%) | 304 (38.9%)    | 249 (38.9%) | 55 (39.3%)  |
| 70+                                            | 173 (24.2%) | 13 (13.7%)  | 160 (25.8%) | 187 (24.1%)    | 154 (24.2%) | 32 (22.9%)  |
| <b>Gender</b>                                  |             |             |             |                |             |             |
| Female                                         | 529 (73.6%) | 71 (74.7%)  | 458 (73.4%) | 577 (74.0%)    | 486 (76.1%) | 91 (65.0%)  |
| Male                                           | 186 (25.8%) | 21 (22.1%)  | 165 (26.4%) | 197 (25.2%)    | 147 (23.0%) | 49 (35.0%)  |
| Other                                          | 4 (0.6%)    | 3 (3.2%)    | 1 (0.2%)    | 5(0.8%)        | 6 (0.9%)    | 0 (0%)      |
| <b>Ethnicity</b>                               |             |             |             |                |             |             |
| White British                                  | 672 (93.4%) | 87 (91.5%)  | 585 (93.7%) | 725 (93.0%)    | 606 (94.8%) | 119 (85.0%) |
| Other/Mixed/Multiple ethnic groups             | 28 (3.8%)   | 5 (5.2%)    | 23 (3.6%)   | 31 (3.9%)      | 18 (2.8%)   | 13 (9.2%)   |
| Asian/Asian British                            | 12 (1.6%)   | 2 (2.1%)    | 10 (1.8%)   | 14 (1.7%)      | 8 (1.2%)    | 6 (4.2%)    |
| Black/African/Caribbean/Black/British          | 7 (0.9%)    | 1 (1.05%)   | 6 (0.9%)    | 9 (1.1%)       | 7 (1.0%)    | 2 (1.4%)    |
| <b>Diagnoses</b>                               |             |             |             |                |             |             |
| <b>MSK Conditions</b>                          |             |             |             |                |             |             |
| Osteoarthritis                                 | 230 (31.9%) | 37 (38.9%)  | 193 (30.9%) | 263 (33.7%)    | 240 (37.5%) | 23 (16.4%)  |
| Rheumatoid arthritis                           | 227 (31.5%) | 30 (31.5%)  | 197 (31.5%) | 247 (31.7%)    | 212 (33.1%) | 35 (25.0%)  |
| Fibromyalgia/ Chronic Widespread Pain          | 174 (24.2%) | 34 (35.7%)  | 140 (22.4%) | 192 (24.6%)    | 178 (27.8%) | 14 (10.0%)  |
| Osteoporosis                                   | 92 (12.7%)  | 13 (13.6%)  | 79 (12.6%)  | 99 (12.7%)     | 86 (13.4%)  | 13 (9.2%)   |
| Psoriatic arthritis                            | 82 (11.4%)  | 8 (8.4%)    | 74 (11.8%)  | 87 (11.1%)     | 70 (10.9%)  | 17 (12.1%)  |
| Other inflammatory condition                   | 63 (8.7%)   | 16 (16.8%)  | 47 (7.5%)   | 67 (8.6%)      | 59 (9.2%)   | 8 (5.7%)    |
| Axial spondyloarthritis                        |             |             |             |                |             |             |
| ankylosing spondylarthritis                    | 58 (8.0%)   | 13 (13.6%)  | 45 (7.2%)   | 65 (8.3%)      | 53 (8.2%)   | 12 (8.5%)   |
| Myositis                                       | 47 (6.5%)   | 4 (4.2%)    | 43 (6.8%)   | 50 (6.4%)      | 32 (5.0%)   | 18 (12.8%)  |
| <b>Comorbidities</b>                           |             |             |             |                |             |             |
| Other health conditions                        | 234 (32.5%) | 36 (37.8%)  | 198 (31.7%) | 255 (32.7%)    | 207 (32.1%) | 48 (34.2%)  |
| Anxiety                                        | 189 (26.2%) | 35 (36.8%)  | 154 (24.6%) | 209 (26.8%)    | 182 (28.4%) | 27 (19.2%)  |
| Depression                                     | 155 (21.5%) | 35 (36.8%)  | 120 (19.2%) | 173 (22.2%)    | 159 (24.8%) | 14 (10.0%)  |
| Gastrointestinal disease                       | 93 (12.9%)  | 11 (11.5%)  | 82 (13.1%)  | 100 (12.8%)    | 84 (13.1%)  | 16 (11.4%)  |
| Heart Disease                                  | 69 (9.5%)   | 5 (5.2%)    | 64 (10.2%)  | 77 (9.8%)      | 63 (9.8%)   | 14 (10.0%)  |
| Systemic sclerosis                             | 63 (8.7%)   | 10 (10.5%)  | 53 (8.4%)   | 70 (8.9%)      | 59 (9.2%)   | 11 (7.8%)   |
| Previous Cancer                                | 50 (6.9%)   | 8 (8.4%)    | 42 (6.7%)   | 58 (7.4%)      | 51 (7.9%)   | 7 (5.0%)    |
| Sjogren s Syndrome                             | 48 (6.6%)   | 9 (9.4%)    | 39 (6.2%)   | 51 (6.5%)      | 42 (6.5%)   | 9 (6.4%)    |
| <b>Townsend deprivation scores (quintiles)</b> |             |             |             |                |             |             |
| 1                                              | 105 (14.6%) | 6 (6.3%)    | 99 (15.8%)  | 145 (18.6%)    | 120 (18.7%) | 25 (17.8%)  |
| 2                                              | 63 (8.7%)   | 13 (13.6%)  | 50 (8.01%)  | 48 (6.1%)      | 40 (6.2%)   | 8 (5.7%)    |
| 3                                              | 127 (17.6%) | 16 (16.8%)  | 111 (17.7%) | 243 (31.1%)    | 197 (30.8%) | 46 (32.8%)  |
| 4                                              | 110 (15.2%) | 11 (11.5%)  | 99 (15.8%)  | 119 (15.2%)    | 94 (14.7%)  | 25 (17.8%)  |
| 5                                              | 314 (43.6%) | 49 (51.5%)  | 265 (42.4%) | 224 (28.7%)    | 188 (29.4%) | 36 (25.7%)  |

N/A – not applicable, SD – Standard deviation, MSK – musculoskeletal. \* Some participants reported more than one diagnosis. ∞ includes MSK diseases above and the following chronic diseases listed in the questionnaire: angina, heart attack, heart disease, anxiety, gastrointestinal disease, stroke, COPD, diabetes, cancer, multiple sclerosis, depression, and other health conditions (participants asked to specify).

**Supplementary Table S2 (A): Univariate analysis**

|                                     | Supplements |            | Sleep aids  |                   | Pain relievers |                   |
|-------------------------------------|-------------|------------|-------------|-------------------|----------------|-------------------|
|                                     | unadjusted  |            | unadjusted  |                   | unadjusted     |                   |
|                                     | Odds Ratio  | 95% CI     | Odds Ratio  | 95% CI            | Odds Ratio     | 95% CI            |
| <b>Age</b>                          |             |            |             |                   |                |                   |
| 18-39                               | Referent    | Referent   | Referent    | Referent          | Referent       | Referent          |
| 40-54                               | 0.96        | 0.62, 1.47 | <b>0.3</b>  | <b>0.15, 0.58</b> | 1.84           | 1.00, 3.38        |
| 55-69                               | 0.81        | 0.55, 1.18 | <b>0.39</b> | <b>0.22, 0.69</b> | 1.5            | 0.86, 2.55        |
| >70                                 | 0.95        | 0.57, 1.58 | <b>0.21</b> | <b>0.10, 0.42</b> | 1.59           | 0.88, 2.87        |
| <b>Sex</b>                          |             |            |             |                   |                |                   |
| Female                              | Referent    | Referent   | Referent    | Referent          | Referent       | Referent          |
| Male                                | 1.27        | 0.90, 1.78 | 0.84        | 0.49, 1.39        | 0.56           | 0.38, 0.84        |
| Other                               | 2.65        | 0.34, 53.8 | 19.8        | 2.49, 403         | -              | NA                |
| <b>Ethnicity</b>                    |             |            |             |                   |                |                   |
| Non-White                           | Referent    | Referent   | Referent    | Referent          | Referent       | Referent          |
| White                               | 0.89        | 0.43, 1.79 | 2.35        | 0.69, 14.7        | 1.71           | 0.70, 3.79        |
| <b>Townsend deprivation scores</b>  |             |            |             |                   |                |                   |
| 1                                   | Referent    | Referent   | Referent    | Referent          | Referent       | Referent          |
| 2                                   | 1.12        | 0.70, 1.80 | 1.46        | 0.70, 3.09        | 1.08           | 0.47, 2.73        |
| 3                                   | 0.92        | 0.57, 1.47 | 1.25        | 0.59, 2.69        | 0.92           | 0.53, 1.57        |
| 4                                   | 1.19        | 0.74, 1.91 | 1.47        | 0.72, 3.10        | 0.84           | 0.45, 1.56        |
| 5                                   | 0.84        | 0.53, 1.35 | 1.74        | 0.86, 3.61        | 1.13           | 0.64, 1.96        |
| <b>Rheumatoid. Arthritis</b>        |             |            |             |                   |                |                   |
| No                                  | Referent    | Referent   | Referent    | Referent          | Referent       | Referent          |
| Yes                                 | 1.01        | 0.73, 1.38 | 0.8         | 0.49, 1.28        | <b>1.49</b>    | <b>0.99, 2.29</b> |
| <b>Lupus</b>                        |             |            |             |                   |                |                   |
| No                                  | Referent    | Referent   | Referent    | Referent          | Referent       | Referent          |
| Yes                                 | 0.69        | 0.30, 1.57 | 0.95        | 0.22, 2.83        | 0.87           | 0.35, 2.66        |
| <b>Fibromyalgia</b>                 |             |            |             |                   |                |                   |
| No                                  | Referent    | Referent   | Referent    | Referent          | Referent       | Referent          |
| Yes                                 | 1.1         | 0.77, 1.55 | <b>1.91</b> | <b>1.19, 3.02</b> | <b>3.49</b>    | <b>2.02, 6.48</b> |
| <b>Osteoarthritis</b>               |             |            |             |                   |                |                   |
| No                                  | Referent    | Referent   | Referent    | Referent          | Referent       | Referent          |
| Yes                                 | 1.1         | 0.80, 1.51 | 1.2         | 0.75, 1.87        | <b>3.58</b>    | <b>2.22, 6.05</b> |
| <b>Other inflammatory condition</b> |             |            |             |                   |                |                   |
| No                                  | Referent    | Referent   | Referent    | Referent          | Referent       | Referent          |
| Yes                                 | 1.19        | 0.71, 2.04 | <b>2.54</b> | <b>1.34, 4.61</b> | 1.68           | 0.83, 3.88        |
| <b>Sjogren s Syndrome</b>           |             |            |             |                   |                |                   |
| No                                  | Referent    | Referent   | Referent    | Referent          | Referent       | Referent          |
| Yes                                 | 0.93        | 0.52, 1.70 | 1.6         | 0.71, 3.28        | 1.02           | 0.51, 2.29        |
| <b>Gout</b>                         |             |            |             |                   |                |                   |
| No                                  | Referent    | Referent   | Referent    | Referent          | Referent       | Referent          |
| Yes                                 | 0.99        | 0.42, 2.38 | <b>0</b>    | —                 | 1.55           | 0.53, 6.64        |
| <b>Myositis</b>                     |             |            |             |                   |                |                   |
| No                                  | Referent    | Referent   | Referent    | Referent          | Referent       | Referent          |
| Yes                                 | 0.71        | 0.39, 1.29 | 0.6         | 0.18, 1.54        | <b>0.36</b>    | <b>0.20, 0.67</b> |
| <b>Systemic sclerosis</b>           |             |            |             |                   |                |                   |
| No                                  | Referent    | Referent   | Referent    | Referent          | Referent       | Referent          |
| Yes                                 | 1.08        | 0.64, 1.84 | 1.29        | 0.60, 2.54        | 1.19           | 0.63, 2.46        |
| <b>Psoriatic arthritis</b>          |             |            |             |                   |                |                   |

|                               |          |            |             |                   |             |                   |
|-------------------------------|----------|------------|-------------|-------------------|-------------|-------------------|
| No                            | Referent | Referent   | Referent    | Referent          | Referent    | Referent          |
| Yes                           | 0.74     | 0.47, 1.18 | 0.7         | 0.30, 1.41        | 0.89        | 0.52, 1.61        |
| <b>Axial spondylarthritis</b> |          |            |             |                   |             |                   |
| No                            | Referent | Referent   | Referent    | Referent          | Referent    | Referent          |
| Yes                           | 0.85     | 0.49, 1.47 | <b>2.08</b> | <b>1.04, 3.92</b> | 0.97        | 0.52, 1.94        |
| <b>Osteoporosis</b>           |          |            |             |                   |             |                   |
| No                            | Referent | Referent   | Referent    | Referent          | Referent    | Referent          |
| Yes                           | 0.65     | 0.42, 1.02 | 1.11        | 0.57, 2.04        | 1.52        | 0.85, 2.93        |
| <b>Vasculitis</b>             |          |            |             |                   |             |                   |
| No                            | Referent | Referent   | Referent    | Referent          | Referent    | Referent          |
| Yes                           | 0.82     | 0.28, 2.43 | <b>0</b>    | —                 | 0.65        | 0.22, 2.36        |
| <b>Multimorbidity</b>         |          |            |             |                   |             |                   |
| 0                             | Referent | Referent   | Referent    | Referent          | Referent    | Referent          |
| 1                             | 0.88     | 0.61, 1.26 | 0.84        | 0.47, 1.49        | 0.81        | 0.53, 1.24        |
| 2                             | 0.74     | 0.48, 1.13 | 1.44        | 0.78, 2.64        | 1.6         | 0.92, 2.85        |
| ≥3                            | 0.89     | 0.51, 1.54 | 1.68        | 0.76, 3.64        | <b>2.87</b> | <b>1.12, 8.11</b> |

**Supplementary Table S2 (B): Factors associated with administering supplements, sleep aids, and pain relievers adjusted for age and sex.**

|                                    | Supplements |            | Sleep aids  |                   | Pain relievers |                   |
|------------------------------------|-------------|------------|-------------|-------------------|----------------|-------------------|
|                                    | adjusted    |            | adjusted    |                   | adjusted       |                   |
|                                    | Odds Ratio  | 95% CI     | Odds Ratio  | 95% CI            | Odds Ratio     | 95% CI            |
| <b>Age</b>                         |             |            |             |                   |                |                   |
| 18-39                              | Referent    | Referent   | Referent    | Referent          | Referent       | Referent          |
| 40-54                              | 1.04        | 0.62, 1.73 | <b>0.31</b> | <b>0.16, 0.61</b> | <b>1.96</b>    | <b>1.06, 3.62</b> |
| 55-69                              | 0.87        | 0.54, 1.40 | <b>0.42</b> | <b>0.24, 0.77</b> | 1.57           | 0.90, 2.69        |
| >70                                | 1.04        | 0.62, 1.75 | <b>0.23</b> | <b>0.11, 0.48</b> | 1.79           | 0.97, 3.27        |
| <b>Sex</b>                         |             |            |             |                   |                |                   |
| Female                             | Referent    | Referent   | Referent    | Referent          | Referent       | Referent          |
| Male                               | 1.28        | 0.90, 1.82 | 0.81        | 0.46, 1.37        | 0.55           | 0.37, 0.83        |
| Other                              | 2.5         | 0.31, 51.2 | 12.4        | 1.43, 266         | -              | NA                |
| <b>Ethnicity</b>                   |             |            |             |                   |                |                   |
| Non-White                          | Referent    | Referent   | Referent    | Referent          | Referent       | Referent          |
| White                              | 0.9         | 0.43, 1.82 | 2.56        | 0.74, 16.1        | 1.71           | 0.69, 3.84        |
| <b>Townsend deprivation scores</b> |             |            |             |                   |                |                   |
| 1 (Least deprived)                 | Referent    | Referent   | Referent    | Referent          | Referent       | Referent          |
| 2                                  | 1.07        | 0.67, 1.73 | 1.34        | 0.63, 2.89        | 0.98           | 0.42, 2.49        |
| 3                                  | 0.89        | 0.55, 1.42 | 1.29        | 0.60, 2.79        | 0.93           | 0.54, 1.60        |
| 4                                  | 1.15        | 0.71, 1.85 | 1.4         | 0.67, 3.00        | 0.82           | 0.43, 1.54        |
| 5                                  | 0.82        | 0.51, 1.31 | 1.73        | 0.85, 3.65        | 1.1            | 0.62, 1.94        |
| <b>Rheumatoid Arthritis</b>        |             |            |             |                   |                |                   |
| No                                 | Referent    | Referent   | Referent    | Referent          | Referent       | Referent          |
| Yes                                | 1.03        | 0.74, 1.42 | 0.85        | 0.51, 1.38        | <b>1.58</b>    | <b>1.04, 2.44</b> |
| <b>Lupus</b>                       |             |            |             |                   |                |                   |
| No                                 | Referent    | Referent   | Referent    | Referent          | Referent       | Referent          |
| Yes                                | 0.73        | 0.31, 1.67 | 0.76        | 0.17, 2.34        | 0.81           | 0.31, 2.51        |
| <b>Fibromyalgia</b>                |             |            |             |                   |                |                   |
| No                                 | Referent    | Referent   | Referent    | Referent          | Referent       | Referent          |

|                                     |          |            |             |                   |             |                   |
|-------------------------------------|----------|------------|-------------|-------------------|-------------|-------------------|
| Yes                                 | 1.17     | 0.82, 1.69 | <b>1.81</b> | <b>1.10, 2.97</b> | <b>3.44</b> | <b>1.95, 6.48</b> |
| <b>Osteoarthritis</b>               |          |            |             |                   |             |                   |
| No                                  | Referent | Referent   | Referent    | Referent          | Referent    | Referent          |
| Yes                                 | 1.16     | 0.83, 1.63 | 1.64        | 0.99, 2.73        | <b>3.34</b> | <b>2.03, 5.75</b> |
| <b>Other inflammatory condition</b> |          |            |             |                   |             |                   |
| No                                  | Referent | Referent   | Referent    | Referent          | Referent    | Referent          |
| Yes                                 | 1.23     | 0.73, 2.11 | <b>2.62</b> | <b>1.36, 4.85</b> | 1.69        | 0.83, 3.93        |
| <b>Sjogren s Syndrome</b>           |          |            |             |                   |             |                   |
| No                                  | Referent | Referent   | Referent    | Referent          | Referent    | Referent          |
| Yes                                 | 1.01     | 0.55, 1.86 | 1.58        | 0.68, 3.33        | 0.89        | 0.44, 2.03        |
| <b>Gout</b>                         |          |            |             |                   |             |                   |
| No                                  | Referent | Referent   | Referent    | Referent          | Referent    | Referent          |
| Yes                                 | 0.93     | 0.39, 2.25 | <b>0</b>    | —                 | 1.86        | 0.61, 8.11        |
| <b>Myositis</b>                     |          |            |             |                   |             |                   |
| No                                  | Referent | Referent   | Referent    | Referent          | Referent    | Referent          |
| Yes                                 | 0.71     | 0.39, 1.29 | 0.55        | 0.16, 1.43        | <b>0.38</b> | <b>0.20, 0.71</b> |
| <b>Systemic sclerosis</b>           |          |            |             |                   |             |                   |
| No                                  | Referent | Referent   | Referent    | Referent          | Referent    | Referent          |
| Yes                                 | 1.14     | 0.67, 1.97 | 1.25        | 0.56, 2.55        | 1.03        | 0.54, 2.14        |
| <b>Psoriatic arthritis</b>          |          |            |             |                   |             |                   |
| No                                  | Referent | Referent   | Referent    | Referent          | Referent    | Referent          |
| Yes                                 | 0.73     | 0.46, 1.17 | 0.71        | 0.30, 1.46        | 0.96        | 0.55, 1.76        |
| <b>Axial spondylarthritis</b>       |          |            |             |                   |             |                   |
| No                                  | Referent | Referent   | Referent    | Referent          | Referent    | Referent          |
| Yes                                 | 0.79     | 0.45, 1.38 | <b>2.32</b> | <b>1.13, 4.52</b> | 1.12        | 0.59, 2.28        |
| <b>Osteoporosis</b>                 |          |            |             |                   |             |                   |
| No                                  | Referent | Referent   | Referent    | Referent          | Referent    | Referent          |
| Yes                                 | 0.66     | 0.42, 1.05 | 1.44        | 0.71, 2.74        | 1.36        | 0.75, 2.66        |
| <b>Vasculitis</b>                   |          |            |             |                   |             |                   |
| No                                  | Referent | Referent   | Referent    | Referent          | Referent    | Referent          |
| Yes                                 | 0.75     | 0.25, 2.23 | <b>0</b>    | —                 | 0.69        | 0.23, 2.55        |
| <b>Multimorbidity</b>               |          |            |             |                   |             |                   |
| 0                                   | Referent | Referent   | Referent    | Referent          | Referent    | Referent          |
| 1                                   | 0.86     | 0.60, 1.24 | 0.95        | 0.53, 1.72        | 0.8         | 0.51, 1.23        |
| 2                                   | 0.72     | 0.47, 1.10 | 1.38        | 0.74, 2.57        | 1.71        | 0.97, 3.08        |
| ≥3                                  | 0.88     | 0.50, 1.53 | 1.48        | 0.66, 3.26        | <b>2.78</b> | <b>1.10, 8.20</b> |
